# Supplementary material
Source: Springer Nature journal article supplement (https://www.springermedizin.de/resource/supplementary/12879_2007_655_MOESM2_ESM.pdf/9449436)

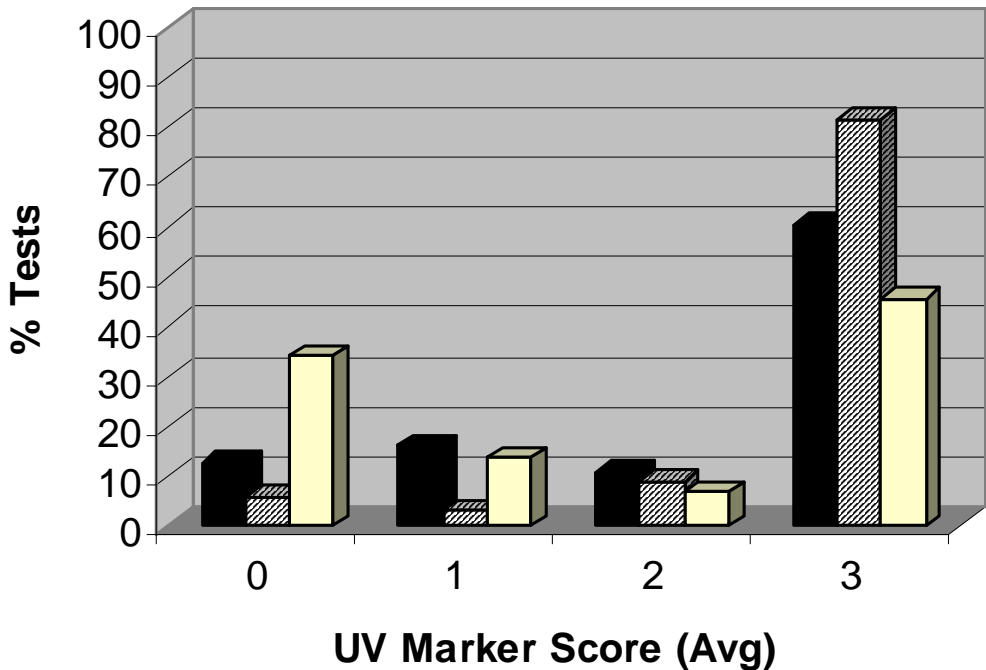

■ Ward 1    ▨ Ward 2    □ Ward 3

Supplement: MOESM2 [file 9449436]
